# Supplementary material for: Indirect signs of infravesical obstruction on voiding cystourethrography improve post-neonatal posterior urethral valves detection rate
Source: Springer Nature journal article supplement (doi:10.1007/s00330-023-10126-z), 2023-08-19
Supplement: MOESM1 [file 25939932]

## Indirect signs of infravesical obstruction on voiding cystourethrography improve post-neonatal posterior urethral valves detection rate

### Electronic Supplementary Material

**Supplementary Table 1. Clinical, radiological, and biochemical characteristics of the non-toilet-trained patients, with and without PUV.**

|                                               | <b>All patients<br/>No.= 70</b> | <b>PUV (no)<br/>No.= 52</b> | <b>PUV (yes)<br/>No.= 18</b> | <b>p</b> |
|-----------------------------------------------|---------------------------------|-----------------------------|------------------------------|----------|
| <b>Age at cystography, yr, median (IQR)</b>   | 0.40 (0.50)                     | 0.39 (0.47)                 | 0.42 (0.66)                  | 0.65     |
| <b>Birth weight, kg, mean (SDS)</b>           | 3.2 (0.58)                      | 3.2 (0.57)                  | 3.2 (0.63)                   | 0.88     |
| <b>Birth weight &lt;2500gr, No. (%)</b>       | 7 (10.0)                        | 4 (7.7)                     | 3 (16.7)                     | 0.32     |
| <b>Preterm birth, No. (%)</b>                 | 13 (18.6)                       | 9 (17.3)                    | 4 (22.2)                     | 0.73     |
| <b>Febrile UTI, No. (%)</b>                   | 30 (42.8)                       | 21 (40.4)                   | 9 (50.0)                     | 0.5      |
| <b>Non-febrile UTI, No. (%)</b>               | 9 (12.8)                        | 7 (13.5)                    | 2 (11.1)                     | 0.99     |
| <b>UTI and UTD, No. (%)</b>                   | 17 (24.3)                       | 11 (21.1)                   | 6 (33.3)                     | 0.29     |
| <b>UTI without VUR, No. (%)</b>               | 18 (25.7)                       | 12 (23.1)                   | 6 (33.3)                     | 0.22     |
| <b>UTI with VUR, No. (%)</b>                  | 16 (22.8)                       | 12 (23.1)                   | 4 (22.2)                     | 0.99     |
| <b>Monolateral APDP&gt;15mm, No. (%)</b>      | 13 (18.6)                       | 11 (21.1)                   | 2 (11.1)                     | 0.49     |
| <b>Bilateral APDP&gt;5mm, No. (%)</b>         | 23 (32.8)                       | 17 (32.7)                   | 6 (33.3)                     | 0.96     |
| <b>Megaureter&gt;7mm, No. (%)</b>             | 18 (25.7)                       | 12 (23.1)                   | 6 (33.3)                     | 0.39     |
| <b>Bilateral megaureter, No. (%)</b>          | 3 (4.3)                         | 1 (1.9)                     | 2 (11.1)                     | 0.09     |
| <b>PUV direct signs on VCUG, No. (%)</b>      | 7 (10)                          | 0 (0)                       | 7 (38.9)                     | <0.001   |
| <b>PUV indirect signs on VCUG, No. (%)</b>    | 17 (24.2)                       | 5 (9.6)                     | 12 (66.7)                    | <0.001   |
| <b>PUV direct and indirect signs, No. (%)</b> | 1 (1.4)                         | 0 (0)                       | 1 (5.6)                      | 0.25     |
| <b>Any radiological sign, No. (%)</b>         | 23 (32.8)                       | 5 (9.6)                     | 18 (100.0)                   | <0.001   |
| <b>Presence of VUR, No. (%)</b>               | 25 (35.7)                       | 19 (36.5)                   | 6 (33.3)                     | 0.80     |
| <b>KL&lt;2SDS, No. (%)</b>                    | 8 (11.4)                        | 5 (9.6)                     | 3 (16.6)                     | 0.41     |
| <b>SRF&lt;40%, No. (%)</b>                    | 13 (18.6)                       | 10 (19.2)                   | 3 (16.7)                     | 0.81     |
| <b>Hypertension, No. (%)</b>                  | 0 (0)                           | 0 (0)                       | 0 (0)                        | 0.99     |
| <b>Reduced eGFR, No. (%)</b>                  | 0 (0)                           | 0 (0)                       | 0 (0)                        | 0.99     |
| <b>Proteinuria, No. (%)</b>                   | 2 (2.9)                         | 2 (3.8)                     | 0 (0)                        | 0.99     |
| <b>Kidney injury, No. (%)</b>                 | 2 (2.9)                         | 2 (3.8)                     | 0 (0)                        | 0.99     |

For normal distributed variables means  $\pm$  SDS are shown, while for non-parametric ones median and interquartile range are shown.

*Abbreviations:* APDP, antero-posterior diameter of the pelvis; eGFR, estimated glomerular filtration rate; IQR, interquartile range; KL, kidney length; PUV, posterior urethral valves; SDS, standard deviation score; SRF, split renal function; UTD, urinary tract dilation; UTI, urinary tract infection; VCUG, voiding cystourethrography; VUR, vesico-ureteral reflux.

**Supplementary Table 2. Clinical, radiological, and biochemical characteristics of the toilet-trained patients with and without PUV.**

|                                                       | <b>All patients<br/>No.= 48</b> | <b>PUV (no)<br/>No.= 23</b> | <b>PUV (yes)<br/>No.= 25</b> | <b>p</b> |
|-------------------------------------------------------|---------------------------------|-----------------------------|------------------------------|----------|
| <b>Age at cystography, yr, mean (SDS)</b>             | 7.4 (4.1)                       | 6.5 (4.3)                   | 8.3 (3.8)                    | 0.13     |
| <b>Birth weight, kg, mean, (SDS)</b>                  | 3.1 (0.47)                      | 3.0 (0.46)                  | 3.1 (0.49)                   | 0.57     |
| <b>Birth weight &lt;2500gr, No. (%)</b>               | 6 (12.5)                        | 3 (13.0)                    | 3 (12.0)                     | 0.99     |
| <b>Preterm birth, No. (%)</b>                         | 7 (14.6)                        | 3 (13.0)                    | 4 (16.0)                     | 0.99     |
| <b>Micturition symptoms, No. (%)</b>                  | 24 (50.0)                       | 8 (34.8)                    | 16 (64.0)                    | 0.04     |
| <b>Febrile UTI, No. (%)</b>                           | 13 (27.1)                       | 5 (21.7)                    | 8 (32.0)                     | 0.42     |
| <b>Non-febrile UTI, No. (%)</b>                       | 12 (25.0)                       | 4 (17.4)                    | 8 (32.0)                     | 0.32     |
| <b>UTI and UTD, No. (%)</b>                           | 4 (8.3)                         | 3 (13.0)                    | 1 (4.0)                      | 0.34     |
| <b>UTI without VUR, No. (%)</b>                       | 8 (16.7)                        | 2 (8.7)                     | 6 (24.0)                     | 0.25     |
| <b>UTI with VUR, No. (%)</b>                          | 11 (22.9)                       | 5 (21.7)                    | 6 (24.0)                     | 0.99     |
| <b>Pathological uroflowmetry, No. (%)</b>             | 25 (52.1)                       | 8 (34.8)                    | 17 (68.0)                    | 0.02     |
| <b>Pathological uroflowmetry without UTI, No. (%)</b> | 14 (29.2)                       | 4 (17.4)                    | 10 (40.0)                    | 0.12     |
| <b>Pathological uroflowmetry with UTI, No. (%)</b>    | 8 (16.7)                        | 0 (0)                       | 8 (32.0)                     | 0.004    |
| <b>Monolateral APDP&gt;15mm, No. (%)</b>              | 5 (10.4)                        | 3 (13.0)                    | 2 (8.0)                      | 0.66     |
| <b>Bilateral APDP&gt;5mm, No. (%)</b>                 | 6 (12.5)                        | 3 (13.0)                    | 3 (12.0)                     | 0.99     |
| <b>Megaureter&gt;7mm, No. (%)</b>                     | 4 (8.3)                         | 2 (8.7)                     | 2 (8.0)                      | 0.99     |
| <b>Bilateral megaureter, No. (%)</b>                  | 2 (4.2)                         | 1 (4.3)                     | 1 (4.0)                      | 0.99     |
| <b>PUV direct signs on VCUG, No. (%)</b>              | 15 (31.2)                       | 0 (0)                       | 15 (60.0)                    | <0.001   |
| <b>PUV indirect signs on VCUG, No. (%)</b>            | 16 (33.3)                       | 3 (13.0)                    | 13 (52.0)                    | 0.006    |
| <b>PUV direct and indirect signs, No. (%)</b>         | 4 (8.3)                         | 0 (0)                       | 4 (16.0)                     | 0.11     |
| <b>Any radiological sign, No. (%)</b>                 | 27 (56.3)                       | 3 (13.0)                    | 24 (96.0)                    | <0.001   |
| <b>Presence of VUR, No. (%)</b>                       | 14 (29.2)                       | 7 (30.4)                    | 7 (28.0)                     | 0.85     |
| <b>KL&lt;2SDS, No. (%)</b>                            | 9 (18.9)                        | 4 (17.4)                    | 5 (20.0)                     | 0.99     |
| <b>SRF&lt;40%, No. (%)</b>                            | 6 (12.5)                        | 2 (8.7)                     | 4 (16.0)                     | 0.67     |
| <b>Hypertension, No. (%)</b>                          | 0 (0)                           | 0 (0)                       | 0 (0)                        | 0.99     |
| <b>Reduced eGFR, No. (%)</b>                          | 5 (10.4)                        | 3 (13.0)                    | 2 (8.0)                      | 0.66     |
| <b>Proteinuria, No. (%)</b>                           | 1 (2.1)                         | 0 (0)                       | 1 (4.0)                      | 0.99     |
| <b>Kidney injury, No. (%)</b>                         | 6 (12.5)                        | 3 (13.0)                    | 3 (12.0)                     | 0.99     |

For normal distributed variables means  $\pm$  SDS are shown, while for non-parametric ones median and interquartile range are shown.

*Abbreviations:* APDP, antero-posterior diameter of the pelvis; eGFR, estimated glomerular filtration rate; IQR, interquartile range; KL, kidney length; PUV, posterior urethral valves; SDS, standard deviation score; SRF, split renal function; UTD, urinary tract dilation; UTI, urinary tract infection; VCUG, voiding cystourethrography; VUR, vesico-ureteral reflux.
